# Supplementary material
Source: PubMed Central journal article supplement (PMC1283452)
Supplement: pnas_0507960102_1.pdf [file pnas_0507960102_1.pdf]

230 240 250 260 270 280 290 300

eIF5\_YEAST EWAVDMSEEAIRARAKELE-----VNSLSTQLDEYGEWILLEQAGEDKE-NLPSDVELYKKAEDVLDNDPKTGCVLQAQ---CLFDEEDVNN--EIAEH  
eIF5\_CANGL EWAVDMSEEAIRARAKELQ--VANGA-----VDTELTKLEEYGEWIIINEAGEDKS-NLPSDVELYKKAIVEDVLDSPDKIACVLAQ---CITFEDIVN--EISEH  
eIF5\_CANAL EWAVDMSQEAIARAKARELE-----GLSLQNNKDFEFGEWLLKESNGSKD-DLPSDVELYKRVIELEIADTPELTVQLVLAQ---VLFDDDIIN--QIPEH  
eIF5\_KLULA DWAVDMSEEAIRARAKELQGEADK-----ETGFEKSLKEEFGEWLHE-----E-ELPTDIELYKKAIAEELLEDDPKVAAVLVAQ---VLDEEDIVS--DISEP  
eIF5\_EREGO DWAVDVSEEAIVARALELQGEDG-----NVSKFSTLDFEFGEWVLAG-GSDDD-ELPNDAIVYKKAIELELLQEPKIACVLAQ---ALFDENIVD--QISTH  
eIF5\_DEBHA DWAVDMSEEAIEARARELE-GLS-----LNEDQKFNQFGEWLLDESKDSKD-DLPSDIDILYKRVIELEILENPELTVQLVLAQ---VLFDDDIIE--QIEEH  
eIF5\_YARLI TWTVDTSEAAVAAVQREVEQGVA-GI-----ALEENDYTFIPEGWCSL-----GEPDVELYKKAIELEIGSDSKTVOVLAQ---TIEDDKIVK--QDEH  
eIF5\_SCHPO DWAVDTSEEAIVARAVQLEGNMKDSLTLSDLRGDEEEAESSRDQFGEWLED-----NYPGVSVDVEIYKMKKEENIHHKSAIVVLAQ---CIITSPVVG--EIEKH  
eIF5\_ASPNI NNNVVDVSEEAIVARAKELPDDLKRALALDEGD-DEGADGTPTAYDELGSGWLDLTATEKGGISKVEDVEIYLKAKELGLETCHKHTLAVLAQ---TIIDETAK--QVDGR  
eIF5\_NEUCR EWAVDMSEEAIVARAVQNLPGEFKQKLVNGEEDDEEGGNTVYDQLGTWVDEDAKAGGINNVDDVEIYLKAKELGIDAKHTTAVVLAQ---CLFDENIVA--QIPGR  
eIF5\_GIBZE EWAVDMSEEAIVAKAQSILPGEFKAALNIGDDDEDEGGGPTIYDELGDWISQSAEKEGGIDKVESIDIVYKAKELGIEGKHTVLAQ---TIIDKNIVA--QISKR  
eIF5\_USTMA DWSVDTSEAAVAAVSKALGSEVSSVLVGDGDD--EDEDDESPIYAQFQQLQANRKGQEGREKTPAEVYKKAQFEGIEKHKHTVQLVLAQ---ALTDTEAPK--EIEKY  
eIF5\_CAEEL DWEPEFVPEPNGMLSAGMGK-----LVLDKD--LEKSEEQRDLMLHTFLKAKEEDRISDAKGTALRDEAERLELKQKASILLANV-----LDDDKIVSDKQINTH  
eIF5\_CAEER DWEPEFVPEPNGMLSAGMGK-----LVLDKD--LEKSKERQLDMLHDFLVKAKDEGRISDAKGTALRDEAERLELKQKASILLANV-----LDDDKIVSDKQINTH  
eIF5\_DROME GWSVDVSKAEIRARAKELQDLTDGAGK-MTISDD--YDKTEKERIDIFYELVKDKRDKKQLDDVQTHKELVIEAERLIDINKAPVLVAE-----LETENIHK--DVQKN  
eIF5\_ANOGA SMTVDTSEEAIVARAVQDLTDGAKN-MTVSDD--FDKTEKERIDIFYELVKDKRDKKQLDDVQTHKELVIEAERLIDINKAPVLVAE-----LETENIHK--DVQKN  
eIF5\_TETNI DWAEETTEEAQRRRMEETSDHAKN-LTLSDD--LEKPLEERVDFYFNFKVQRKENGITID--GADKEILAEERLIDVKAMGPLILSEI-----LENESIRE--QIKKY  
eIF5\_DANRE DWAEETTEEAQRRRMEETSEHAKG-LTLTED--LEKSLERVNIYFNFKVKKKDSGTID--SADKDI LAEERLIDVKAMGPLILSEI-----LEDENIRD--QIKKY  
eIF5\_XENLA DWGEDTTAEAQRRRMEETSDHAKN-LTLSDD--LEKPFVEYRNLDFVFKKKEEGVID--FCDDKILAEERLIDVKAMGPLVLSVEI-----LDDDKIRD--QIKKY  
eIF5\_GALGA DWGEDTTAEAQRRRMEETSDHAKN-LTLSDD--LERTVEERVNLLDFVFKKKEEGVID--SSDKDI LAEERLIDVKAMGPLVLSVEI-----LDEKIRE--QIRKY  
eIF5\_MOUSE DWGEDTTAEAQRRRMEETSDHAKG-LTLSDD--LERTVEERVNLLDFVFKKKEEGVID--SSDKDI LAEERLIDVKAMGPLVLSVEI-----LDEKIRE--QIKKY  
eIF5\_HUMAN DWGEDTTAEAQRRRMEETSDHAKV-LTLSDD--LERTIEERVNLLDFVFKKKEEGVID--SSDKDI LAEERLIDVKAMGPLVLSVEI-----LENEKIRE--QIKKY

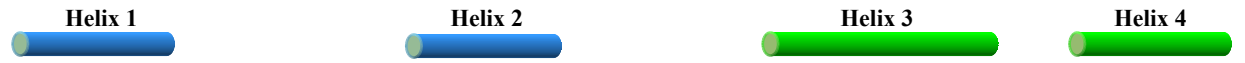

eIF2Be\_YEAST DFEKEGLATVERAMENNHD-----LDTALLELTLRSMNV-----TYHEVRIATITALLRRVYHFIAQT--LGRKDAVVK--VFNQW  
eIF2Be\_CANGL DFLVFGLATVERAIEENDHD-----LDTALLELTLRSMNV-----TYHEVRIATATALLRRVYHFITQT--LGRKEAVFK--VFGQW  
eIF2Be\_DEBHA DFEKELATVDRSMENNHD-----LDTALLELTLRSMNV-----TYHEVRLATSKALLHKTTHFITDTT--LDVKEATEK--IENKN  
eIF2Be\_SCHPO DFNKEAQSLSRRAEFENNHQ-----IDIAALELTLRSMANNA-----NYHEVRSATVALLARRMHLDV--SKEALAK--VMTWR  
eIF2Be\_USTMA EFRSAAIASLRAEFENHT-----VDDAAIELTLRSMANV-----PLKEVRKVTVEIILHKDCPEQ--PKQMLK--VLDKW  
eIF2Be\_ARATH YFEKEVEGTVLRVAEENIK-----PDLVLTMEINSGRLSFMN-----ESADCAGATFFSMIKLALDTPHNSGS--EYKNAAS--ITTKW  
eIF2Be\_DROME SFPGRSDLSLTRGFREKSN-----VDFVLEINSGRLSAYNM-----SLKEVNFNVKVAEIMGQSIIVEPANDN--WLVAINA--AFKQL  
eIF2Be\_GALGA VFQNEVLTGLQGRGEEENIS-----CQNLVLEINSLKWAYNI-----SLNEMMQVLSKVVLEFPLQQLDANLDSQNFSAIILP--LAKNW  
eIF2Be\_RABIT VFQNEVLTGLQGRGKEENIS-----CQNLVLEINSLKWAYNI-----SLKEVMQVLSHVVLEFPLQQMDSPLEANRYCALLLP--LAKNW  
eIF2Be\_HUMAN VFQNEVLTGLQGRGKEENIS-----CQNLVLEINSLKWAYNV-----SLKEVMQVLSHVVLEFPLQQMDSPLSSRYCALLLP--LAKNW

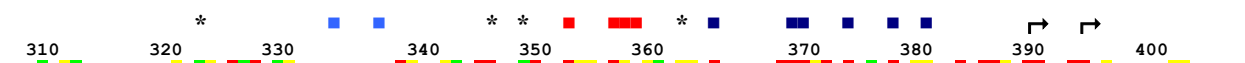

310 320 330 340 350 360 370 380 390 400

eIF5\_YEAST NAFITKLLV-TPEYEKNFMGGIERFLGLEH---KDLIPLTKIILVQLVNNIIISSEELMRFGTNS---SKKFPKPEVSKKVRRAAKPFIITWLETARSDDEEDDE\*  
eIF5\_CANGL SAFTTKKLVFV-NADYEKNLGGIERFLGLEH---KELIPLTKIILVQLVNNIIISSEELMRFGTNS---SKKFPKPDVSKKVRRAAKPFIITWLENASDEESDEE\*  
eIF5\_CANAL VGLITKINGDEEFKALGLSERLFFGLEK---PNLIPQIPIKILHGFVDRDLISEEVLKIKGSKV---SKKYPKPDVSKKVRRAAKPFIITWLETARSDDEEDDE\*  
eIF5\_KLULA TAFITQKLLV-DEDFEKNFLGGIERFLGLDH---QELIPLTKIILVQLVNNIIISSEELMRFGTNC---SKKFPKPDVSKKVRRAAKPFIITWLETARSDDEEDDE\*  
eIF5\_EREGO AALAQKLFV-SDDFEKQLGLSERLFLGLDH---PDLIPLTKIILVQLVNNIIISSEELMRFGTNC---SKKFPKPEVSKKVRRAAKPFIITWLENASDEESD\*  
eIF5\_DEBHA LGLLAKLIDHSDSFEKSLGLSERLFLGLEN---QALISALPKIILVITMDKOLISEEVIISGSKV---SKKYPKPDVSKKVRRAAKPFIITWLETARSDDEEDDE\*  
eIF5\_YARLI KGLITKIVA-SDEHEKALGGIERLVLGLTH---PDLIPLTKIILVQLVNNIIISSEELMRFGTNC---SKRYVDRKSKKVRRAAKPFIITWLETARSDDEEDDE\*  
eIF5\_SCHPO GALFKKICT-TDKHERALLGGIERLFLGLDH---LVHIDVVKIILVQLVNNIIISSEELMRFGTNC---SKKYVSRKSKKVRRAAKPFIITWLENASDEESDEE\*  
eIF5\_ASPNI APLAKKIT-T-SERHEKALGGIERLFLGKEH---PELLISQVAVILGMYQNDLVSEETLKAQCSKA---SKKYVDIQSRKVRRAAKPFIITWLETARSDDEEDDE\*  
eIF5\_NEUCR APMKRVVT-SERHEKALGGIERLFLADLG---KESDKIVKILQLYVHHDLCSSEVITKNGSKA---SKKYVDGTSKVRRAAKPFIITWLETARSDDEEDDE\*  
eIF5\_GIBZE ASMKQVVT-SERHERALLGGIERLVLGGADHPMPQSVIKIILQLYVHHDLCSSEVITKNGSKA---SKKYVDISTSKVRRAAKPFIITWLETARSDDEEDDE\*  
eIF5\_USTMA GAVLVKVVGDSEKHKQAMGGFERLAGVQC---PTLVNGVFKIIMALYQIDVLDLDFVKNNGTHV---SKKYVSDISKVRRAAKPFIITWLETARSDDEEDDE\*  
eIF5\_CAEEL RNLILRLTLNDKKAQRYLLGVEQVIHKHE---AELLTKSAHIKSLYDVEDEEDSLISNGERP---SKKYVSKSFAKIIENSQVILNWLKREAEETFEESDDEI\*  
eIF5\_CAEER RNLILRLVMDLTKKAQRYLLRGIEQVIHRYE---DDLTKSAHIKSLYDADICEEVLISNGERP---SKKYVSKSFAKIIENSQVILNWLKREAEETFEESDDEI\*  
eIF5\_DROME RPLILRLTLNPKAQRYYLIGSVEQVVELHK---GILMSKVAIGIKFLYDLILDEAVILVIAQKV---SKRHVSKNIAAEIHERAKPFIITWLENASDEESDEE\*  
eIF5\_ANOGA RNLILRLTHEDKKAQRYLLIGSLEQVLSLHA---DKMLKVFGLKFLDVLDEKVIDLVSQRK---SKKYVSKETAQIHERAKPFIITWLETARSDDEEDDE\*  
eIF5\_TETNI KRHLRLCHNNKKAQRYLLGGFECVVKLHQ---VQLLPRVVIILKLDADLLEEDVITFAEAKAV---SKKYVSKELAKEIHAKEPFIITWLETARSDDEEDDE\*  
eIF5\_DANRE KRHLRLCHNNKKAQRYLLGGFECVVKLHQ---TQLLPRVVIILKLDADLLEEDVITFAEAKAV---SKKYVSKELAKEIHAKEPFIITWLETARSDDEEDDE\*  
eIF5\_XENLA RRHLRLCHNNKKAQRYLLHGFECVIDMHQ---SHLSKIPHIKEMMDADLLEEVILSWEAKP---SKKYVSKELAKDIRAKPFIITWLETARSDDEEDDE\*  
eIF5\_GALGA RRHLRLCHNNKKAQRYLLHGFECVVMAMHQ---SLLSKIPHIKEMMDADLLEEVILSWEAKP---SKKYVSKELAKDIRAKPFIITWLETARSDDEEDDE\*  
eIF5\_MOUSE RRHLRLCHNNKKAQRYLLHGLECVVMAMHQ---AQLISKIPHIKEMMDADLLEEVILSWEAKP---SKKYVSKELAKEIRKAEPFIITWLETARSDDEEDDE\*  
eIF5\_HUMAN RRHLRLCHNNKKAQRYLLHGLECVVMAMHQ---AQLISKIPHIKEMMDADLLEEVILSWEAKP---SKKYVSKELAKEIRKAEPFIITWLETARSDDEEDDE\*

eIF2Be\_YEAST GLLFKRQVDFEEYIDLNLIMEKIVEQSF---DKPDILFSAIVSLDNDIIEEDVLYKWDNV-----STDPRYDEVKLLVYKVVLELQNDDESEEE\*  
eIF2Be\_CANGL GALLNROVFEPEEYIDLNLIMEIAEQKF---EKPEFLESAINTLDNDIIEEDSYEWDNV-----SQDSKYDQVKTITAKWVDWRNRAEESDDE\*  
eIF2Be\_DEBHA GLLFKRQVDFEEYVDLILIQDVCNSVDK---SYNGRILEMANIYNQDIVEEENLYKWDSE-----SSTANDELVQVRLITKGVVDLWLEAESEESD\*  
eIF2Be\_SCHPO GLLLAKLIFSHEEQVDNVLITLQKCVRLS-----MTRHFTQLIGYFVLEAEENAEQEYSDP-----RSSEGAALRDAGGQVVDLWLEAESEESGE\*  
eIF2Be\_USTMA CPLISVVA--VDDQIEALAVQHCARTEG---YFKLPLPLKPKVNDVISENIVGWNKSPLSRESSEAVGGEKGNLRAAEVIRYILESQSDDEEDDE\*  
eIF2Be\_ARATH KDLLGFYAKKIDIEQVIMKFEEMCQESH---ELGPLETQIHLVLDKVDVLEQADLIRVIEEEK---AGADEADKYLQCDFTFIQWLKREAEESDDEEDDE\*  
eIF2Be\_DROME CFVYSNYIKSDESDMMLKALELDYEENHL---VRGKISQVHYLVLDKDFVLSAIAQAYLAQ-----DEEHAHLRQSLAKLVAIDLQSSKEDDDEDD\*  
eIF2Be\_GALGA TPLIKNYIKRSSDHLNALFAIEEFLEHDS---LCTSIKAVIMTFFVQLEILEEDVILNWFSLR---DTSDKGQLRKNQRLQRFIOWLKEAEESDGD\*  
eIF2Be\_RABIT SPVFRNYIKRAADHLEALAAIEEFLEHEA---LGTCAKVMGMGFVQLEILAEETILSIFGQR---DVTDKGRQLRKNQRLQRFIOWLKEAEESDDE\*  
eIF2Be\_HUMAN SPVFRNYIKRAADHLEALAAIEDFELEHA---LGISMAKVMGMGFVQLEILAEETILSIFGQR---DITDKGQLRKNQRLQRFIOWLKEAEESDDE\*
