# Supplementary material
Source: PubMed Central journal article supplement (PMC1283452)
Supplement: pnas_0507960102_3.pdf [file pnas_0507960102_3.pdf]

**Table 1. Plasmids used in this study**

| Plasmid                   | Description                                             | Reference  |
|---------------------------|---------------------------------------------------------|------------|
| pGEX-TIF5                 | GST-eIF5 fusion plasmid                                 | (1)        |
| pGEX-TIF5-AN1             | pGEX-TIF5 carrying <i>AN1</i>                           | This study |
| pGEX-TIF5 $\Delta$ 10     | pGEX-TIF5 carrying <i>E396<math>\Delta</math></i>       | This study |
| pGEX-TIF5-AN1 $\Delta$ 10 | pGEX-TIF5 carrying <i>AN1 E396<math>\Delta</math></i>   | This study |
| pGEX-TIF5-BN1             | pGEX-TIF5 carrying <i>BN1</i>                           | This study |
| pGEX-TIF5-BN2             | pGEX-TIF5 carrying <i>BN2</i>                           | This study |
| Ep1522                    | pGEX-TIF5 carrying <i>W391<math>\Delta</math></i>       | (2)        |
| YCplac111                 | Single copy (sc) <i>LEU2</i> vector                     | (3)        |
| YCpTIF5                   | <i>Sc LEU2 TIF5-FL</i> plasmid                          | (1)        |
| pKA757                    | <i>Sc LEU2 TIF5</i> plasmid                             | This study |
| YCpTIF5-AN1               | <i>Sc LEU2 tif5-AN1</i> plasmid                         | This study |
| YCpTIF5 $\Delta$ 10       | <i>Sc LEU2 tif5-E396<math>\Delta</math></i> plasmid     | This study |
| YCpTIF5-AN1 $\Delta$ 10   | <i>Sc LEU2 tif5-AN1 E396<math>\Delta</math></i> plasmid | This study |
| YCpTIF5-BN1               | <i>Sc LEU2 tif5-BN1</i> plasmid                         | This study |
| YCpTIF5-BN2               | <i>Sc LEU2 tif5-BN2</i> plasmid                         | This study |
| YCpTIF5F-BN1              | <i>Sc LEU2 tif5-FL-BN1</i> plasmid                      | This study |
| YCpTIF5F-BN2              | <i>Sc LEU2 tif5-FL-BN2</i> plasmid                      | This study |
| YEplac195                 | High copy (hc) <i>URA3</i> vector                       | (3)        |
| YEplac112                 | Hc <i>TRP1</i> vector                                   | (3)        |
| p1780-IMT                 | Hc <i>URA3 SUI2 SUI3 GCD11 IMT</i> plasmid              | (1)        |
| YEpW-SUI1                 | Hc <i>TRP1 SUI1</i> plasmid                             | This study |

1. Asano, K., Krishnamoorthy, T., Phan, L., Pavitt, G. D. & Hinnebusch, A. G. (1999) *EMBO J* **18**, 1673-1688.
2. Singh, C. R., Curtis, C., Yamamoto, Y., Hall, N. S., Kruse, D. S., Hannig, E. M. & Asano, K. (2005) *Mol Cell Biol* **25**, 5480-5491.
3. Gietz, R. D. & Sugino, A. (1988) *Gene* **74**, 527-534.
