# Supplementary material
Source: PubMed Central journal article supplement (PMC1283452)

**A****a**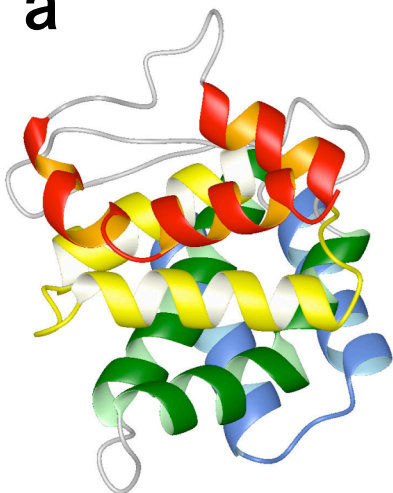**b**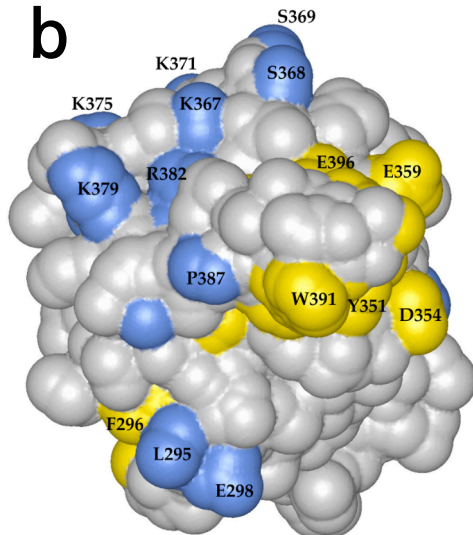**c**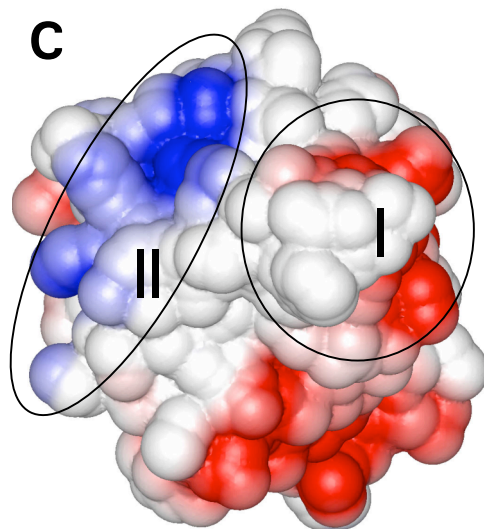**B**

eIF5-CTD surface charge

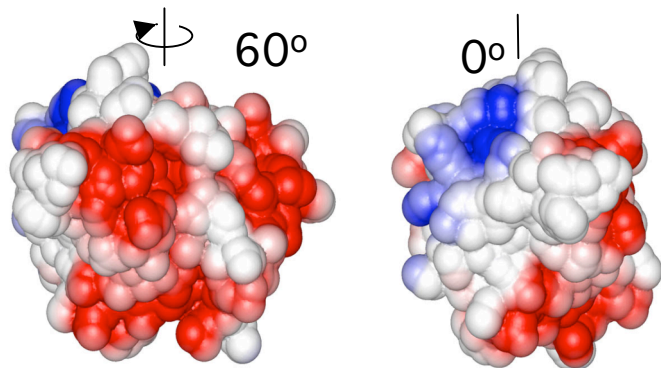**C**eIF2B $\epsilon$ -CTD surface charge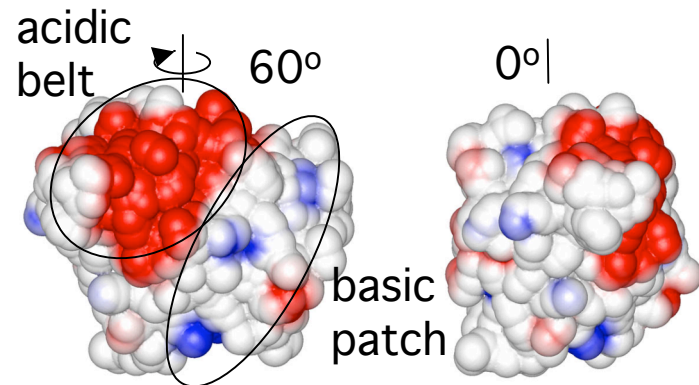

Supplement: pnas_0507960102_2.pdf [file pnas_0507960102_2.pdf]
